# Supplementary material
Source: PubMed Central journal article supplement (PMC5860286)
Supplement: kwx045moodywebmaterialfinal.pdf [file kwx045moodywebmaterialfinal.pdf]

## **Web Appendix 1**

The questionnaires and protocols can be obtained as follows:

### **Brazil (PNS 2013)**

Questionnaires: [www.pns.icict.fiocruz.br/index.php?pag=proposicao](http://www.pns.icict.fiocruz.br/index.php?pag=proposicao)

Nurse measurement protocols:

[www.pns.icict.fiocruz.br/arquivos/Novos/Manual%20de%20Antropometria%20PDF.pdf](http://www.pns.icict.fiocruz.br/arquivos/Novos/Manual%20de%20Antropometria%20PDF.pdf)

Blood sample collection protocol: [www.pns.icict.fiocruz.br/index.php?pag=coleta](http://www.pns.icict.fiocruz.br/index.php?pag=coleta)

### **Chile (ENS2009)**

The questionnaires are available from <http://epi.minsal.cl/estudios-y-encuestas-poblacionales/encuestas-poblacionales/encuesta-nacional-de-salud/cuestionarios-ens/>

The interview, nurse and laboratory protocols are currently not publicly available, but may be released on request to the Ministry of Health.

### **Colombia (ENSIN 2010)**

The questionnaire can be found on pages 60-70 at:

[www.icbf.gov.co/portal/page/portal/PortalICBF/bienestar/nutricion/ensin/LibroENSIN2010.pdf](http://www.icbf.gov.co/portal/page/portal/PortalICBF/bienestar/nutricion/ensin/LibroENSIN2010.pdf)

The measurement protocols can be found from page 77 onwards at:

<https://www.minsalud.gov.co/sites/rid/Lists/BibliotecaDigital/RIDE/VS/ED/GCFI/Base%20de%20datos%20ENSIN%20-%20Protocolo%20Ensin%202010.pdf>

### **Colombia (ENS 2007)**

The questionnaire and protocols are available from the corresponding author.

### **Mexico (ENSANUT 2012)**

The questionnaire files and protocols can be downloaded for free from

<http://ensanut.insp.mx/basesdoctos.php#.V2UxWrsrKUk>. An email to INSP is required to request access (via 'Contacto' on that website).

**England (HSE 2013)**

The technical report includes the questionnaires and the measurement protocols:

[www.hscic.gov.uk/catalogue/PUB16076/HSE2013-Methods-and-docs.pdf](http://www.hscic.gov.uk/catalogue/PUB16076/HSE2013-Methods-and-docs.pdf)

**Scotland (SHeS 2008-2011)**

The technical report includes the questionnaires and the measurement protocols:

[www.gov.scot/Publications/2012/09/8038](http://www.gov.scot/Publications/2012/09/8038)

**USA (NHANES 2011-12)**

The questionnaires are available from: [www.cdc.gov/nchs/nhanes/nhanes2011-2012/questionnaires11\\_12.htm](http://www.cdc.gov/nchs/nhanes/nhanes2011-2012/questionnaires11_12.htm)

The measurement and laboratory protocols can be downloaded from:

[www.cdc.gov/nchs/nhanes/nhanes2011-2012/manuals11\\_12.htm](http://www.cdc.gov/nchs/nhanes/nhanes2011-2012/manuals11_12.htm)

**Web Table 1. Sampling & stratification**

| Country  | Survey      | Sampling frame                                                                                                                                  | Stage | Sampling stages                                     | N                                                                     | Stratification of areas                                                                       | PPS sampling                                                                                     | Oversampling                                                                                                                       |                      |
|----------|-------------|-------------------------------------------------------------------------------------------------------------------------------------------------|-------|-----------------------------------------------------|-----------------------------------------------------------------------|-----------------------------------------------------------------------------------------------|--------------------------------------------------------------------------------------------------|------------------------------------------------------------------------------------------------------------------------------------|----------------------|
|          |             |                                                                                                                                                 |       |                                                     |                                                                       |                                                                                               |                                                                                                  | Areas                                                                                                                              | Population subgroups |
| WHO      | STEPS       |                                                                                                                                                 |       |                                                     | At least 50-100 PSUs selected, so $\geq 100$ sampling units available | Depends on information available from sampling frame & information needed from survey results | The selection probability for the PSU is proportional to the number of households or individuals |                                                                                                                                    |                      |
| Brazil   | PNS 2013    | 2010 Census tracts selected from the IBGE national master sampling plan                                                                         | 1     | Census tract                                        | 6,076                                                                 |                                                                                               | Yes – census tract                                                                               |                                                                                                                                    | No                   |
|          |             |                                                                                                                                                 | 2     | Households                                          | 10-14 per census tract                                                |                                                                                               |                                                                                                  |                                                                                                                                    |                      |
|          |             |                                                                                                                                                 | 3     | Individuals                                         | 1 per household                                                       |                                                                                               |                                                                                                  |                                                                                                                                    |                      |
| Chile    | ENS 2009/10 | List of census tracts & population size by age and sex of population; projections using Census 2002, adjusted annually through vital statistics | 1     | Municipality                                        | 146                                                                   | Region: type of area (urban, rural); size of municipality                                     | Yes – area segments                                                                              | All large & middle-size municipalities; random sample of small counties; oversampling of non-Santiago metropolitan and rural areas | Persons aged 65+     |
|          |             |                                                                                                                                                 | 2     | Area segments: blocks (urban); census units (rural) | 624                                                                   |                                                                                               |                                                                                                  |                                                                                                                                    |                      |
|          |             |                                                                                                                                                 | 3     | Households                                          | 6 per area segment                                                    |                                                                                               |                                                                                                  |                                                                                                                                    |                      |
|          |             |                                                                                                                                                 | 4     | Individuals                                         | 1 per household                                                       |                                                                                               |                                                                                                  |                                                                                                                                    |                      |
| Colombia | ENS 2007    | List of municipalities and population (National Census 2005)                                                                                    | 1     | Municipality                                        | 177                                                                   | Population size, Urban-rural proportion; unsatisfied basic needs, socioeconomic               | Yes – area segments                                                                              | Largest 59 municipalities selected with certainty                                                                                  |                      |
|          |             |                                                                                                                                                 | 2     | Area segments: blocks (urban); census units (rural) | 4,263                                                                 |                                                                                               |                                                                                                  |                                                                                                                                    |                      |
|          |             |                                                                                                                                                 | 3     | Households                                          | Average 12 per segment                                                |                                                                                               |                                                                                                  |                                                                                                                                    |                      |

| Country | Survey       | Sampling frame                                               | Stage                                               | Sampling stages                                 | N                                                                         | Stratification of areas                                                                                             | PPS sampling             | Oversampling                                      |                      |                                                                          |                       |
|---------|--------------|--------------------------------------------------------------|-----------------------------------------------------|-------------------------------------------------|---------------------------------------------------------------------------|---------------------------------------------------------------------------------------------------------------------|--------------------------|---------------------------------------------------|----------------------|--------------------------------------------------------------------------|-----------------------|
|         |              |                                                              |                                                     |                                                 |                                                                           |                                                                                                                     |                          | Areas                                             | Population subgroups |                                                                          |                       |
|         |              |                                                              | 4                                                   | Individuals                                     | All aged under 18, 1 per hh aged 18-69, 2 per hh with 4+ 18-69 year olds. | level                                                                                                               |                          |                                                   |                      |                                                                          |                       |
|         | ENSIN 2010   | List of municipalities and population (National Census 2005) | 1                                                   | Municipality                                    | 258                                                                       | Population size; urban-rural proportion; unsatisfied basic needs index; socioeconomic level; geographical proximity | Yes – area segments      | Largest 89 municipalities selected with certainty |                      |                                                                          |                       |
| 2       |              |                                                              | Area segments: blocks (urban); census units (rural) | 4,987                                           |                                                                           |                                                                                                                     |                          |                                                   |                      |                                                                          |                       |
| 3       |              |                                                              | Households                                          | Average 10 per segment                          |                                                                           |                                                                                                                     |                          |                                                   |                      |                                                                          |                       |
| 4       |              |                                                              | Individuals                                         | All the eligible individuals from the household |                                                                           |                                                                                                                     |                          |                                                   |                      |                                                                          |                       |
| Mexico  | ENSANUT 2012 | 2005 and 2010 Household and Population Census                | 1                                                   | AGEBs (geostatistical areas)                    |                                                                           | 1,082                                                                                                               |                          | Urban / rural                                     | Yes - AGEBS          | 288 extra households of vulnerable population oversampled per state (32) |                       |
|         |              |                                                              | 2                                                   | 2                                               | City: blocks                                                              | Rural: Communities                                                                                                  | 6 per city AGEB          |                                                   |                      |                                                                          | 3 per rural AGEB      |
|         |              |                                                              |                                                     |                                                 |                                                                           | Rural: 50 households (pseudoblocks)                                                                                 |                          |                                                   |                      |                                                                          | 1 per rural community |
|         |              |                                                              | 3                                                   | 4                                               | Households                                                                | 6 per city block                                                                                                    | 12 per rural pseudoblock |                                                   |                      |                                                                          |                       |
|         |              |                                                              | 4                                                   | 5                                               | Individuals                                                               | 1 individual from each of:<br>Child <5 years<br>Child 5-9 years<br>Adolescent<br>Adult<br>Users of health services  |                          |                                                   |                      |                                                                          |                       |

| Country  | Survey         | Sampling frame                                       | Stage | Sampling stages                                 | N                              | Stratification of areas                                                                                                                         | PPS sampling                     | Oversampling                                         |                                                                                           |
|----------|----------------|------------------------------------------------------|-------|-------------------------------------------------|--------------------------------|-------------------------------------------------------------------------------------------------------------------------------------------------|----------------------------------|------------------------------------------------------|-------------------------------------------------------------------------------------------|
|          |                |                                                      |       |                                                 |                                |                                                                                                                                                 |                                  | Areas                                                | Population subgroups                                                                      |
| England  | HSE 2013       | List of addresses (small-user Postcode Address File) | 1     | Area segment: postcode sectors                  | 588                            | Region; local government area; % non-manual occupation                                                                                          | Yes – postcode sectors           | Smallest regions (North East & East Midlands)        | No                                                                                        |
|          |                |                                                      | 2     | Addresses                                       | 16 in each postcode sector     |                                                                                                                                                 |                                  |                                                      |                                                                                           |
|          |                |                                                      | (3)   | (Household if >1 at the address)                | 1                              |                                                                                                                                                 |                                  |                                                      |                                                                                           |
|          |                |                                                      | 3 (4) | Individual                                      | Up to 10 adults and 2 children |                                                                                                                                                 |                                  |                                                      |                                                                                           |
| Scotland | SHeS 2008-2011 | List of addresses (small-user Postcode Address File) | 1     | Area segment: postcode sectors <sup>a</sup>     | 1,865                          | Area (Health Board); level of area-based deprivation                                                                                            | Yes – postcode sectors           | Most deprived areas (below 15 <sup>th</sup> centile) | No                                                                                        |
|          |                |                                                      | 2     | Addresses                                       | 13-18 in each postcode sector  |                                                                                                                                                 |                                  |                                                      |                                                                                           |
|          |                |                                                      | (3)   | (Household if >1 at the address)                | 1                              |                                                                                                                                                 |                                  |                                                      |                                                                                           |
|          |                |                                                      | 3 (4) | Individual                                      | Up to 10 adults and 2 children |                                                                                                                                                 |                                  |                                                      |                                                                                           |
| USA      | NHANES 2011-12 | List of counties & their size                        | 1     | Counties or small groups of contiguous counties | 30                             | Geography (states & census region); population characteristic (% living in rural areas, % minority concentration, % below federal poverty line) | Yes – counties and area segments |                                                      | Individuals drawn at random within designated age-sex-race/ethnicity screening subgroups. |

| Country | Survey | Sampling frame         | Stage | Sampling stages | N                                        | Stratification of areas | PPS sampling | Oversampling |                      |
|---------|--------|------------------------|-------|-----------------|------------------------------------------|-------------------------|--------------|--------------|----------------------|
|         |        |                        |       |                 |                                          |                         |              | Areas        | Population subgroups |
|         |        | List of segments       | 2     | Area segments   | 24 in each county                        |                         |              |              |                      |
|         |        | List of all households | 3     | Households      | 32 in each area segment                  |                         |              |              |                      |
|         |        |                        | 4     | Individuals     | 0-all depending on subgroup of interest. |                         |              |              |                      |

ENS: Encuesta Nacional de Salud; ENSANUT: Encuesta Nacional de Salud y Nutrición; ENSIN: Encuesta Nacional de Situación Nutricional; HSE: Health Survey for England; hh: household; IGBE: Brazilian Institute of Geography and Statistics; NHANES: National Health And Nutrition Examination Survey; PNS: Pesquisa Nacional de Saúde; PPS: Probability Proportional to Size; SHeS: Scottish Health Survey.

<sup>a</sup> The clustering of the sample for the SHeS 2008-2011 was geographical (datazones) and groups of geographically near datazones are grouped into batches. The sampling is performed at the beginning of the four-year cycle with a quarter of the batches being randomly assigned to each of the four survey years.

**Web Table 2. Recruitment methods and response rates used in seven national health examination surveys in the Americas and the UK**

| Process                                          | <i>WHO STEPS standard</i>                                                        | Brazil PNS                                                                                        | Chile ENS                                                                                                             | Colombia ENSIN                                                                                        | Colombia ENS          | Mexico ENSANUT                                                                                     | England HSE <sup>a</sup>                                                                                     | Scotland SHeS <sup>a</sup>                                                                                                                                                 | USA NHANES <sup>a</sup> |
|--------------------------------------------------|----------------------------------------------------------------------------------|---------------------------------------------------------------------------------------------------|-----------------------------------------------------------------------------------------------------------------------|-------------------------------------------------------------------------------------------------------|-----------------------|----------------------------------------------------------------------------------------------------|--------------------------------------------------------------------------------------------------------------|----------------------------------------------------------------------------------------------------------------------------------------------------------------------------|-------------------------|
| Survey year                                      | <i>N/A</i>                                                                       | 2013                                                                                              | 2009/2010                                                                                                             | 2010                                                                                                  | 2007                  | 2012                                                                                               | 2013                                                                                                         | 2008-2011                                                                                                                                                                  | 2011/12                 |
| Form of invitation                               | <i>Interviewer visits the address</i>                                            | Advance letter, notifying them an interviewer will visit their home                               | Advance letter, notifying the household an interviewer will visit their home                                          | Interviewer visits the address                                                                        |                       | Interviewer visits the address                                                                     | Advance letter, notifying the household an interviewer will visit their home, plus two information leaflets. | Advance letter, notifying the household an interviewer will call at their home                                                                                             |                         |
| Recruitment process                              | <i>Interviewer visits the address; leaves a notification card if no-one home</i> | Face-to-face, Interviewer visits the household to explain about the survey, recruit participation | Face-to-face, Interviewer visits the household to explain about the survey, select individual & recruit participation | Interviewers visits all households in the segment and conduct the interview where an adult is present |                       | Interviewers visit the household and applies the questionnaire after the consent letter was signed | Interviewer visits the household to explain about the survey, recruit participation & schedule an interview  | Interviewer visits the household to explain about the survey, go through the household screener questionnaire; recruit participation (if eligible) & schedule an interview |                         |
| No of attempts to contact sampled person/address | <i>≥ 2 attempts, at different times of day</i>                                   |                                                                                                   | ≥ 3, different time of day, at least 1 weekend day                                                                    | As many as necessary until finding the woman, mother or head of household                             | 2 attempts on average | 5 attempts                                                                                         | ≥ 6 attempts, at different times of day and day of week                                                      | ≥ 6 attempts, at different times of day and day of week                                                                                                                    |                         |
| Financial incentives                             |                                                                                  | No                                                                                                | No                                                                                                                    | No                                                                                                    | No                    | No                                                                                                 | Unconditional £5 voucher per household                                                                       | All examinees receive remuneration for the MEC visit as well as payment for transportation expenses (\$125)                                                                |                         |

| Process                      | WHO STEPS standard        | Brazil PNS                                                                                                                                                                   | Chile ENS                                                                                                     | Colombia ENSIN                                                             | Colombia ENS                                                                                                                                                    | Mexico ENSANUT                                | England HSE <sup>a</sup>                                                                                                                            | Scotland SHeS <sup>a</sup> | USA NHANES <sup>a</sup>                                                                                                                                                                                                    |
|------------------------------|---------------------------|------------------------------------------------------------------------------------------------------------------------------------------------------------------------------|---------------------------------------------------------------------------------------------------------------|----------------------------------------------------------------------------|-----------------------------------------------------------------------------------------------------------------------------------------------------------------|-----------------------------------------------|-----------------------------------------------------------------------------------------------------------------------------------------------------|----------------------------|----------------------------------------------------------------------------------------------------------------------------------------------------------------------------------------------------------------------------|
| Feedback to participants     |                           | Feedback on blood and urine analysis results.                                                                                                                                | Feedback about risk factors detected in questionnaires, measurements and all blood and urine analysis results | Verbal feedback on anthropometric measurements; written hemoglobin report. | The results of the test were given to the participant along with a leaflet with explanations and recommendations. no advice from the interviewers were provided | Feedback on weight, height and blood pressure | Feedback on physical measurements and blood analysis results                                                                                        |                            | Feedback on physical measurements and blood analysis results                                                                                                                                                               |
| Questionnaire administration | <i>Interviewer</i>        | Interviewer, face-to-face<br>All field staff trained to do the interviews in PDA (Personal Digital Assistance) and to perform anthropometric and blood pressure measurements | Interviewer, face-to-face<br>Capture: PDA                                                                     | By an interviewer                                                          |                                                                                                                                                                 | Interviewer, face-to-face                     | Interviewer face-to-face during the separate visit before examination (nurse visit)<br>Data capture: CAPI (computer-assisted personal interviewing) |                            | <i>Own home:</i> Interviewer face-to-face (Sample Person Questionnaire).<br><i>MEC:</i> ACASI (Audio Computer-Assisted Self-Interview); and CAPI. The MEC environment is considered more appropriate for sensitive topics. |
| Examination place            | <i>Participant's home</i> | Participant's home                                                                                                                                                           | Participant's home                                                                                            | Participant's home or venue close to the home (depending on the setting)   |                                                                                                                                                                 | Participant's home                            | Participant's home                                                                                                                                  |                            | Central examination centre (MEC)                                                                                                                                                                                           |



| Process                            | WHO STEPS standard     | Brazil PNS    | Chile ENS                                            | Colombia ENSIN             | Colombia ENS  | Mexico ENSANUT      | England HSE <sup>a</sup>                                      | Scotland SHeS <sup>a</sup> | USA NHANES <sup>a</sup>                                                                                                                  |
|------------------------------------|------------------------|---------------|------------------------------------------------------|----------------------------|---------------|---------------------|---------------------------------------------------------------|----------------------------|------------------------------------------------------------------------------------------------------------------------------------------|
| Examination time: Days of the week |                        | Monday-Sunday | Monday-Sunday                                        | Monday-Sunday              | Not specified | Monday-Sunday       | Monday-Sunday                                                 |                            | MEC weekday mornings, afternoons and evenings, and every weekend.                                                                        |
| Time of the day: interview         |                        | 08:00-22:00   | 07.00-23.00                                          | Throughout the day         | Not specified | 05:00-21:00         | 08:00-22:00                                                   |                            | Two MEC examination subsamples assigned randomly: morning; and afternoon/evening, with some flexibility for convenience of participants. |
| Time of the day: measurements      |                        | 08:00-22:00   | 08.00-11.00 (mean 09.00)                             | Not specified              |               | 05:00-21:00         | 08:00-22:00                                                   |                            |                                                                                                                                          |
| Season(s) of data collection       |                        | Aug-Jan       | Throughout the year (11 month Oct 2009 to Sept 2010) | Nov-Dec 2009, Feb-Nov 2010 | Jun-Nov 2007  | Oct -May            | Throughout the year                                           |                            | Throughout the year                                                                                                                      |
| Physical measurements by           | <i>Interviewer</i>     | Interviewer   | Trained nurse                                        | Interviewer/nutritionist   | Interviewer   | Interviewer         | Height & weight: Trained interviewer<br>Others: Trained nurse |                            | Medical technician except BP measured by medical doctor                                                                                  |
| Blood samples collected by         | <i>Trained nurse</i>   | Phlebotomist  | Trained nurse                                        | Microbiologist             |               | Trained interviewer | Trained nurse                                                 |                            | Phlebotomist                                                                                                                             |
| Consent for Interview              | <i>Written consent</i> | Yes           | Yes                                                  | Verbal assent              |               | Yes                 | Verbal assent                                                 |                            | Yes                                                                                                                                      |
| <i>Consent for measurements</i>    | <i>Written consent</i> | Yes           | Yes                                                  | Verbal assent              |               | Yes                 | Verbal assent                                                 |                            | Yes                                                                                                                                      |

| Process                        | WHO STEPS standard | Brazil PNS               | Chile ENS                                                                           | Colombia ENSIN                                                                                                       | Colombia ENS                                                                             | Mexico ENSANUT                                                                        | England HSE <sup>a</sup>                                                                                                       | Scotland SHES <sup>a</sup>                       | USA NHANES <sup>a</sup>                                    |
|--------------------------------|--------------------|--------------------------|-------------------------------------------------------------------------------------|----------------------------------------------------------------------------------------------------------------------|------------------------------------------------------------------------------------------|---------------------------------------------------------------------------------------|--------------------------------------------------------------------------------------------------------------------------------|--------------------------------------------------|------------------------------------------------------------|
| Consent for biological samples | Written consent    | Yes                      | Yes                                                                                 | Yes                                                                                                                  |                                                                                          | Yes                                                                                   | Yes (& for passing selected results to participant's doctor; for data linkage; and for storage of samples for future research) |                                                  | Yes                                                        |
| Ethical consent                |                    | National Ethic Committee | Faculty of Medicine of Pontificia Universidad Católica de Chile Ethics review board | Profamilia Institutional Review Board on Research involving Human Subjects & Colombian National Institutes of Health | Cendex from Universidad Javeriana                                                        | Ethics, Research and Biosecurity committee of the National Institute of Public Health | Research Ethics Committee in the national IRAS system<br>Oxford A Research Ethics Committee                                    | Multi-Centre Research Ethics Committee for Wales | National Center for Health Statistics ethics review board. |
| No. sampled                    |                    | 81,254 households        | 7,549 households                                                                    | 51,447 households<br>190,907 individuals                                                                             | 51,764 households<br>96,958 individuals<br>18-69 in co-operating households <sup>c</sup> | 54,784 households                                                                     | 9,408 addresses<br>(8,491 eligible households)                                                                                 | 32,830 addresses<br>(29,576 eligible households) | 2011-2012:<br>13,431 individuals                           |
| No. individuals interviewed    |                    | 69,900 aged 18+          | 5,412 aged 15+                                                                      | 162,331 individuals                                                                                                  | 80,776 adults 18-69                                                                      | 96,031 individuals<br>(55,186 aged 20+)                                               | 8,795 adults                                                                                                                   | 14,685 adults                                    | 9,756 individuals                                          |

| Process                              | WHO STEPS standard | Brazil PNS                                                                           | Chile ENS                                                                                                        | Colombia ENSIN                                                                                           | Colombia ENS                                                                                                                                                   | Mexico ENSANUT                                                                                                                           | England HSE <sup>a</sup>                                                                                                                      | Scotland SHeS <sup>a</sup>                                                                                                                    | USA NHANES <sup>a</sup>                                                    |
|--------------------------------------|--------------------|--------------------------------------------------------------------------------------|------------------------------------------------------------------------------------------------------------------|----------------------------------------------------------------------------------------------------------|----------------------------------------------------------------------------------------------------------------------------------------------------------------|------------------------------------------------------------------------------------------------------------------------------------------|-----------------------------------------------------------------------------------------------------------------------------------------------|-----------------------------------------------------------------------------------------------------------------------------------------------|----------------------------------------------------------------------------|
| No. invited for biophysical measures |                    | The laboratory exams are carried out in a subsample of 25% of selected census tracts | All interviewees invited; but the number of some of the blood and urine exams were limited by budget constraints | 162,331                                                                                                  | 13,301                                                                                                                                                         | The laboratory exams are carried out in a subsample of 30% of selected census tract                                                      | All interviewees                                                                                                                              |                                                                                                                                               | All interviewees                                                           |
| Response rates <sup>b</sup>          |                    | Households: 79%;<br>Individuals within co-operating households interviewed: 86%      | Households with selected person interviewed: 75%;<br>Physical examination: 93%;<br>Blood and urine samples: 91%  | Household: 98%;<br>Individuals within co-operating households: interviewed and measured 85% <sup>c</sup> | Household: 81%;<br>Individuals 18-69 within co-operating households: interviewed 83%;<br>Subsample selected for anthropometric and biometric measurements: 57% | Household: 87%;<br>Selected individuals within co-operating households: interviewed 89%;<br>Selected individuals weighed & measured: 69% | Households: 64%<br>Adults within co-operating households interviewed: 87%;<br>Weight measured: 74%;<br>Nurse visit: 61%;<br>Blood sample: 46% | Households: 63%<br>Adults within co-operating households: interviewed 83%;<br>Weight measured: 68%;<br>Nurse visit: 44%;<br>Blood sample: 33% | Adults within co-operating households interviewed: 73%<br>Examination: 70% |

ENS: Encuesta Nacional de Salud; ENSANUT: Encuesta Nacional de Salud y Nutrición; ENSIN: Encuesta Nacional de Situación Nutricional; HSE: Health Survey for England; NHANES: National Health And Nutrition Examination Survey; PNS: Pesquisa Nacional de Saúde; SHeS: Scottish Health Survey.

<sup>a</sup> These surveys have been run on many occasions. The methods have changed little. Results in this table are for the most recent year, as an example.

<sup>b</sup> For individual studies, the response rate published in the national reports have been used, although the definitions vary by country regarding treatment of non-contacts and ineligible individuals. 'Household' response rate indicates the proportion of selected households in which at least one person was interviewed (subsequently referred to as a 'co-operating household'). Response rates for interview, physical examination, and biological sampling are provided among co-operating households.

<sup>c</sup> Biochemical samples not described in this paper (hemoglobin, ferritin, CRP, vitamins A and B12, and zinc) were taken from children aged 6 months to 17 years and childbearing women. Blood sample response rates were 72% for children and 95% for women.

**Web Table 3. Collection of self-reported data in eight national health examination surveys in the Americas and the UK**

| WHO STEPS standard <sup>a</sup>                                    | Brazil<br>PNS | Chile<br>ENS | Colombia<br>ENSIN | Colombia<br>ENS | Mexico<br>ENSANUT | England<br>HSE <sup>b</sup>        | Scotland<br>SheS <sup>b</sup> | USA<br>NHANES <sup>b</sup>        |
|--------------------------------------------------------------------|---------------|--------------|-------------------|-----------------|-------------------|------------------------------------|-------------------------------|-----------------------------------|
| N/A                                                                | 2013          | 2010         | 2010              | 2007            | 2012              | 2013                               | 2008-2011                     | 2011/12                           |
| STEPS questions collected in person by a trained interviewer/nurse | Yes           | Yes          | Yes               | Yes             | Yes               | Yes                                |                               | Yes                               |
| <b>Demographic</b>                                                 |               |              |                   |                 |                   |                                    |                               |                                   |
| Sex                                                                | Yes           | Yes          | Yes               | Yes             | Yes               | Yes                                |                               | Yes                               |
| Date of birth                                                      | Yes           | Yes          | Yes<br><18years   | No              | Yes               | Yes                                |                               | Yes                               |
| Age                                                                | Yes           | Yes          | Yes               | Yes             | Yes               | Yes                                |                               | Yes                               |
| <i>Ethnicity (locally defined)</i>                                 | Yes           | Not asked    | Yes               | Yes             | Yes               | Yes                                |                               | Yes                               |
| <i>Marital status</i>                                              | Yes           | Yes          | Yes               | Yes             | Yes               | Yes                                |                               | Yes                               |
| <b>Socio-economic</b>                                              |               |              |                   |                 |                   |                                    |                               |                                   |
| No. of years in full-time education (excluding pre-school)         | Yes           | Yes          | Yes               | No              | No                | Age of leaving full-time education |                               | No                                |
| <i>Highest education level completed</i>                           | Yes           | Yes          | Yes               | Yes             | Yes               | Highest educational qualification  |                               | Highest educational qualification |
| <i>Work status (country-specific status)</i>                       | Yes           | Yes          | Yes               | Yes             | Yes               | Yes                                |                               | Occupational Questionnaire        |

| WHO STEPS standard <sup>a</sup>                            | Brazil<br>PNS | Chile<br>ENS                                                | Colombia<br>ENSIN | Colombia<br>ENS | Mexico<br>ENSANUT                                    | England<br>HSE <sup>b</sup> | Scotland<br>SheS <sup>b</sup> | USA<br>NHANES <sup>b</sup>      |
|------------------------------------------------------------|---------------|-------------------------------------------------------------|-------------------|-----------------|------------------------------------------------------|-----------------------------|-------------------------------|---------------------------------|
|                                                            |               |                                                             |                   |                 |                                                      |                             |                               | Section                         |
| <i>No of adults (18+) in the household</i>                 | Yes           | Yes                                                         | Yes               | Yes             | Yes                                                  | Yes                         |                               | No.<br>No of adults<br>aged 60+ |
| <i>Average household earnings in the past year</i>         | Yes           | Yes                                                         | No                | No              | Yes (asked about income per person in the household) | Current household income    |                               | Annual family income            |
| <b>Behavior: Tobacco use</b>                               |               |                                                             |                   |                 |                                                      |                             |                               |                                 |
| Current smoking                                            | Yes           | Yes                                                         | No                | Yes             | Yes                                                  | Yes                         |                               | Yes                             |
| Daily use                                                  | Yes           | Yes                                                         | No                | Yes             | Yes                                                  | Yes                         |                               | Yes                             |
| Age first started smoking for current smokers              | Yes           | Yes                                                         | No                | Yes             | Yes                                                  | Yes                         |                               | Yes                             |
| Consumption & type of tobacco product                      | Yes           | No (number of daily cigarettes, not other tobacco products) | No                | Yes             | No                                                   | Yes                         |                               | Yes                             |
| Quit attempt in past 12 months                             | Yes           | No                                                          | No                | Yes             | No                                                   | No                          |                               | No                              |
| Advised by health worker in past 12 months to stop smoking | Yes           | No                                                          | No                | Yes             | No                                                   | Yes                         |                               | No                              |
| Former smoking                                             | Yes           | Yes                                                         | No                | Yes             | No                                                   | Yes                         |                               | Yes                             |

| WHO STEPS standard <sup>a</sup>                     | Brazil<br>PNS | Chile<br>ENS                                   | Colombia<br>ENSIN | Colombia<br>ENS | Mexico<br>ENSANUT | England<br>HSE <sup>b</sup> | Scotland<br>SheS <sup>b</sup> | USA<br>NHANES <sup>b</sup>                |
|-----------------------------------------------------|---------------|------------------------------------------------|-------------------|-----------------|-------------------|-----------------------------|-------------------------------|-------------------------------------------|
| <i>Age of stopping smoking / time since stopped</i> | Yes           | Time since stopped (<1, 1-6, 6-12, 12+ months) | No                | Yes             | No                | Years since stopped         |                               | Time since stopped                        |
| <i>Passive smoking in the home</i>                  | Yes           | Yes                                            | No                | No              | No                | Yes                         |                               | Smokers in the home                       |
| <i>Passive smoking at work</i>                      | Illegal       | Yes                                            | No                | No              | No                | Illegal since July 2007     | Illegal since March 2006      | Anyone smoked at work within last 2 weeks |
| <i>Smokeless tobacco use</i>                        | Yes           | No                                             | No                | No              | No                | No                          |                               | Yes                                       |
| <b>Behavior: Alcohol consumption</b>                |               |                                                |                   |                 |                   |                             |                               |                                           |
| Any consumption ever                                | Yes           | No                                             | No                | Yes             | Yes               | Yes                         |                               | Yes                                       |
| Any consumption in past 12 months                   | Yes           | Yes                                            | No                | No              | Yes               | Yes                         |                               | Yes                                       |
| Have you stopped drinking due to health reasons     | No            | No                                             | No                | No              | No                | Yes                         | No                            | No                                        |
| Frequency in past 12 months                         | No            | Yes                                            | No                | No              | Yes               | Yes                         |                               | Yes                                       |
| Any consumption in past 30 days                     | No            | Yes                                            | No                | Yes             | No                | (past 7 days)               |                               | Current use (last 12 months)              |
| Frequency in past 30 days                           | (past 7 days) | No                                             | No                | Yes             | No                | (past 7 days)               |                               | Days in past year                         |

| WHO STEPS standard <sup>a</sup>                                                                                                   | Brazil<br>PNS                             | Chile<br>ENS                             | Colombia<br>ENSIN | Colombia<br>ENS                                                                                     | Mexico<br>ENSANUT | England<br>HSE <sup>b</sup>                                                                                                                   | Scotland<br>SheS <sup>b</sup> | USA<br>NHANES <sup>b</sup>              |
|-----------------------------------------------------------------------------------------------------------------------------------|-------------------------------------------|------------------------------------------|-------------------|-----------------------------------------------------------------------------------------------------|-------------------|-----------------------------------------------------------------------------------------------------------------------------------------------|-------------------------------|-----------------------------------------|
| Average consumption on a drinking day in past 30d                                                                                 | No                                        | (Av: last 12m implied)                   | No                | Yes                                                                                                 | No                | (Average wkly consumption in past year)                                                                                                       |                               | (Average wkly consumption in past year) |
| Heaviest consumption in past 30d                                                                                                  | Yes (Heaviest consumption in past 7 days) | (Heaviest consumption in past 12 months) | No                | Yes                                                                                                 | No                | (Heaviest consumption in past 7 days)                                                                                                         |                               | No                                      |
| Frequency of having 5+ (men) / 4+ (women) standard drinks in one occasion in past 30d: STEPS standard drink = 10g/12.7ml alcohol. | Yes                                       | Yes                                      | No                | Yes                                                                                                 | Yes               | No                                                                                                                                            |                               | Ever                                    |
| Consumption on each of past 7 days                                                                                                | (Heaviest consumption in past 7 days)     | Yes                                      | No                | 30 days                                                                                             | No                | No of days drank alcohol in past 7 days;<br>Consumption on highest drinking day in past 7 days;<br>Average wkly consumption in past 12 months |                               | No                                      |
| Consumption of homebrewed alcohol, alcohol not intended for consumption                                                           | No                                        | No                                       | No                | Homebrewed traditional alcohol included in alcohol consumption questions. (Alcohol not intended for | No                | No                                                                                                                                            |                               | No                                      |

| WHO STEPS standard <sup>a</sup>                             | Brazil<br>PNS | Chile<br>ENS                                     | Colombia<br>ENSIN                                            | Colombia<br>ENS           | Mexico<br>ENSANUT | England<br>HSE <sup>b</sup>               | Scotland<br>SheS <sup>b</sup> | USA<br>NHANES <sup>b</sup> |
|-------------------------------------------------------------|---------------|--------------------------------------------------|--------------------------------------------------------------|---------------------------|-------------------|-------------------------------------------|-------------------------------|----------------------------|
|                                                             |               |                                                  |                                                              | consumption not included) |                   |                                           |                               |                            |
| <i>4 questions about problem drinking in past 12 months</i> | No            | (Yes: 1 <sup>st</sup> 3 STEPS qq in AUDIT 13 qq) | No                                                           | No                        | No                | No                                        | No                            | No                         |
| <b>Behavior: Diet</b>                                       |               |                                                  |                                                              |                           |                   |                                           |                               |                            |
| Fruit consumption: frequency in typical wk                  | Yes           | Yes                                              | FFQ: frequency in a mth, a wk & a day                        | No                        | Yes               | No                                        | No                            | No                         |
| Servings of fruit on one day                                | Yes           | Yes                                              | No. FFQ response options: once, twice or three times per day | No                        | Yes               | Detailed questioning about previous 24hrs |                               | Two 24hr recalls           |
| Vegetable consumption: frequency in typical wk              | Yes           | Yes                                              | FFQ: frequency in a mth, a wk & a day                        | No                        | Yes               | No                                        | No                            | No                         |
| Servings of vegetables (not potatoes) on one day            | Yes           | Yes                                              | No. FFQ response options: once, twice or three               | No                        | Yes               | Detailed questioning about previous 24hrs |                               | Two 24hr recalls           |



| WHO STEPS standard <sup>a</sup>                                               | Brazil<br>PNS                                                 | Chile<br>ENS | Colombia<br>ENSIN                                 | Colombia<br>ENS | Mexico<br>ENSANUT                                                           | England<br>HSE <sup>b</sup> | Scotland<br>SheS <sup>b</sup>           | USA<br>NHANES <sup>b</sup>                                       |
|-------------------------------------------------------------------------------|---------------------------------------------------------------|--------------|---------------------------------------------------|-----------------|-----------------------------------------------------------------------------|-----------------------------|-----------------------------------------|------------------------------------------------------------------|
|                                                                               |                                                               |              | times per<br>day                                  |                 |                                                                             |                             |                                         |                                                                  |
| How often add salt or a salty sauce to food when eating / when it is prepared | Question on how much salt they eat (No question on frequency) | No           | The use of table salt. (No question on frequency) | No              | Yes                                                                         | No                          | No                                      | No                                                               |
| How often eat processed food high in salt                                     | No                                                            | No           | No                                                | No              | (Frequency of consumption of some processed foods)                          | No                          | (FFQ for Chips, Crisps & savory snacks) | No                                                               |
| <i>Importance of lowering salt in their diet</i>                              | Yes                                                           | No           | No                                                | No              | No                                                                          | No                          | No                                      | No                                                               |
| <i>Ways they may be trying to reduce the salt in their diet</i>               | No                                                            | No           | No                                                | No              | No                                                                          | No                          | No                                      | No                                                               |
| <i>Type of oil or fat most often used for household meal preparation</i>      | No                                                            | No           | No                                                | No              | Yes (consumption of different types of fats)                                | No                          | No                                      | Yes 24-hour dietary recall                                       |
| <i>Average no. of meals eaten per wk not prepared at home</i>                 | No                                                            | No           | FFQ: meals not prepared at home.                  | No              | Yes 24-hour dietary recall asks whether meals were eaten at home or outside | No                          | No                                      | Yes 24-hour dietary recall asks whether meals were eaten at home |
| <b>Behavior: Physical activity</b>                                            |                                                               |              |                                                   |                 |                                                                             |                             |                                         |                                                                  |

| WHO STEPS standard <sup>a</sup>                                                                                                                                          | Brazil<br>PNS                | Chile<br>ENS | Colombia<br>ENSIN                                       | Colombia<br>ENS                       | Mexico<br>ENSANUT                            | England<br>HSE <sup>b</sup>                                                                           | Scotland<br>SheS <sup>b</sup>                               | USA<br>NHANES <sup>b</sup>                   |
|--------------------------------------------------------------------------------------------------------------------------------------------------------------------------|------------------------------|--------------|---------------------------------------------------------|---------------------------------------|----------------------------------------------|-------------------------------------------------------------------------------------------------------|-------------------------------------------------------------|----------------------------------------------|
| Questions based on a 'typical wk'                                                                                                                                        | Last 30 days and past 7 days | GPAQ         | No. Past 7 days. IPAQ: domains of leisure and transport | No                                    | Based on the last wk)                        | No. Past 4 weeks                                                                                      |                                                             | No. Past 7 days. Questions based on the GPAQ |
| No. of days with a) vigorous b) moderate intensity activity <b>at work</b> , at least 10minutes continuously; duration on typical day for each                           | Yes                          | GPAQ         | No                                                      | No                                    | Yes. They don't specified activities at work | 2012: Specific but different questions (PASBAQ) 2013: IPAQ questions, less detailed                   | More detailed questions for each separate activity (PASBAQ) | Yes                                          |
| No. of days walk or pedal cycle at least 10minutes continuously for travel; duration on typical day                                                                      | Yes                          | GPAQ         | Yes Only for transport in the last 7 days (IPAQ)        | No                                    | Yes                                          | 2012: Travel & leisure not differentiated (PASBAQ) 2013: IPAQ questions, less detailed                | Travel & leisure not differentiated (PASBAQ)                | Yes                                          |
| No. of days with a) vigorous b) moderate intensity <b>sports, fitness or recreational activities</b> , at least 10minutes continuously; duration on typical day for each | Yes                          | GPAQ         | Yes in the last 7 days(IPAQ)                            | (Discrete options not number of days) | Yes                                          | 2012: More detailed questions for each separate activity (PASBAQ) 2013: IPAQ questions, less detailed | More detailed questions for each separate activity (PASBAQ) | Yes                                          |
| <i>Time spent being sedentary on typical day</i>                                                                                                                         | Yes                          | GPAQ         | No. It includes                                         | No                                    | Yes                                          | IPAQ (2012: More                                                                                      | (Screen time on average                                     | Yes                                          |

| WHO STEPS standard <sup>a</sup>                                                             | Brazil<br>PNS | Chile<br>ENS                                                                           | Colombia<br>ENSIN                                 | Colombia<br>ENS | Mexico<br>ENSANUT | England<br>HSE <sup>b</sup>                                         | Scotland<br>SheS <sup>b</sup> | USA<br>NHANES <sup>b</sup>                                                 |
|---------------------------------------------------------------------------------------------|---------------|----------------------------------------------------------------------------------------|---------------------------------------------------|-----------------|-------------------|---------------------------------------------------------------------|-------------------------------|----------------------------------------------------------------------------|
|                                                                                             |               |                                                                                        | screen-time<br>in a sub-<br>sample of<br>children |                 |                   | detailed<br>questions for<br>each separate<br>activity<br>(PASBAQ)) | wkday and<br>wkend day)       |                                                                            |
| <b>Health: History of raised blood pressure</b>                                             |               |                                                                                        |                                                   |                 |                   |                                                                     |                               |                                                                            |
| Ever had BP measured by<br>a doctor/health worker                                           | Yes           | Yes and when was<br>the last time                                                      | No                                                | Yes             | No                | No                                                                  | Yes                           | No                                                                         |
| Self-reported<br>doctor/healthworker-<br>diagnosed raised blood<br>pressure or hypertension | Yes           | Yes                                                                                    | No                                                | Yes             | Yes               | Yes                                                                 | Yes                           | Yes                                                                        |
| Told in past 12 months                                                                      | Yes           | Ever told, once<br>twice or more                                                       | No                                                | Yes             | Yes               | No                                                                  | No                            | No (age of first<br>diagnosis in<br>years)                                 |
| Taken prescribe<br>medication for<br>hypertension in past 2<br>weeks                        | Yes           | Whether taking<br>prescribed<br>medicine for high<br>blood pressure<br>now + ATC codes | No                                                | Yes             | Yes               | Yes (prescribed;<br>taken in past 7<br>days)                        | Yes                           | Whether taking<br>prescribed<br>medicine for<br>high blood<br>pressure now |
| Ever seen a traditional<br>healer for raised blood<br>pressure or hypertension              | No            | Traditional<br>medicine and<br>complementary<br>recorded, not<br>purpose               | No                                                | No              | No                | No                                                                  | No                            | No                                                                         |
| Taking herbal or                                                                            | No            | Herbals recorded,                                                                      | No                                                | No              | Yes               | No                                                                  | No                            | No                                                                         |

| WHO STEPS standard <sup>a</sup>                                            | Brazil<br>PNS | Chile<br>ENS                                                      | Colombia<br>ENSIN | Colombia<br>ENS | Mexico<br>ENSANUT | England<br>HSE <sup>b</sup>            | Scotland<br>SheS <sup>b</sup>          | USA<br>NHANES <sup>b</sup>                                                                      |
|----------------------------------------------------------------------------|---------------|-------------------------------------------------------------------|-------------------|-----------------|-------------------|----------------------------------------|----------------------------------------|-------------------------------------------------------------------------------------------------|
| traditional remedy for raised blood pressure                               |               | not their purpose                                                 |                   |                 |                   |                                        |                                        |                                                                                                 |
| <b>Health: History of diabetes</b>                                         |               |                                                                   |                   |                 |                   |                                        |                                        |                                                                                                 |
| Ever had blood sugar measured by a doctor/health worker                    | Yes           | Yes                                                               | No                | Yes             | No                | No                                     | No                                     | Within the past 3 years                                                                         |
| Self-reported doctor/healthworker-diagnosed raised blood sugar or diabetes | Yes           | Yes                                                               | No                | Yes             | Yes               | Yes                                    | Yes                                    | Yes                                                                                             |
| Told in past 12 months                                                     | No            | Age when first told                                               | No                | Yes             | Yes               | No                                     | No                                     | No (Age when first told)                                                                        |
| Taken prescribe medication for diabetes in past 2 weeks                    | Yes           | Whether taking now, pills or insulin + coded medicines ATC module | No                | Yes             | Yes               | Yes (prescribed; taken in past 7 days) | Yes (prescribed; taken in past 7 days) | Whether taking insulin & diabetic pills now; list of prescribed medicines taken in past 30 days |
| Ever seen a traditional healer for raised blood sugar or diabetes          | No            | No                                                                | No                | No              | No                | No                                     | No                                     | No                                                                                              |
| Taking herbal or traditional remedy for diabetes                           | No            | Herbal medicines recorded, not their purpose                      | No                | No              | Yes               | No                                     | No                                     | No                                                                                              |

| WHO STEPS standard <sup>a</sup>                                            | Brazil<br>PNS | Chile<br>ENS                                        | Colombia<br>ENSIN | Colombia<br>ENS | Mexico<br>ENSANUT | England<br>HSE <sup>b</sup>                                  | Scotland<br>SheS <sup>b</sup>                                | USA<br>NHANES <sup>b</sup>                          |
|----------------------------------------------------------------------------|---------------|-----------------------------------------------------|-------------------|-----------------|-------------------|--------------------------------------------------------------|--------------------------------------------------------------|-----------------------------------------------------|
| <b>For those with Diabetes – additional questions in Pan-American Core</b> |               |                                                     |                   |                 |                   |                                                              |                                                              |                                                     |
| At least two HbA1c measurements in past year                               | Yes           | No                                                  | No                | No              | Yes               | No                                                           | No                                                           | Check within the last year                          |
| Eyes examined in past 2 years                                              | Yes           | Yes (categories are <1y, 1-2y, 2-5y, never)         | No                | No              | Yes               | Yes                                                          | (could volunteer as 'other' regular care in diabetes module) | Yes                                                 |
| Feet examined in past year                                                 | Yes           | Yes                                                 | No                | No              | Yes               | (could volunteer as 'other' regular care in diabetes module) |                                                              | Yes                                                 |
| <b>Health: History of raised total cholesterol</b>                         |               |                                                     |                   |                 |                   |                                                              |                                                              |                                                     |
| Ever had cholesterol levels measured by a doctor/healthworker              | Yes           | Yes + month/year last measured                      | No                | Yes             | Yes               | Yes                                                          | Yes                                                          | Yes                                                 |
| Self-reported doctor/healthworker-diagnosed raised cholesterol             | Yes           | Yes                                                 | No                | Yes             | Yes               | Yes                                                          | Yes                                                          | Yes                                                 |
| Told in past 12 months                                                     | Yes           | No (Age 1 <sup>st</sup> told)                       | No                | Yes             | No                | Yes                                                          | Yes                                                          | No                                                  |
| Taken prescribe medication for raised total cholesterol in past 2 weeks    | Yes           | Whether taking prescribed medication to lower blood | No                | No              | Yes               | Yes (prescribed; taken in past 7 days)                       | Yes (prescribed; taken in past 7 days)                       | Whether taking prescribed medication to lower blood |

| WHO STEPS standard <sup>a</sup>                                            | Brazil<br>PNS | Chile<br>ENS                                                                                                                             | Colombia<br>ENSIN | Colombia<br>ENS | Mexico<br>ENSANUT | England<br>HSE <sup>b</sup> | Scotland<br>SheS <sup>b</sup> | USA<br>NHANES <sup>b</sup> |
|----------------------------------------------------------------------------|---------------|------------------------------------------------------------------------------------------------------------------------------------------|-------------------|-----------------|-------------------|-----------------------------|-------------------------------|----------------------------|
|                                                                            |               | cholesterol +<br>Actual medication<br>use module:<br>ATC statins codes.<br>Number of years<br>and months since<br>started is<br>recorded |                   |                 |                   |                             |                               | cholesterol now            |
| Ever seen a traditional<br>healer for raised<br>cholesterol                | No            | No <sup>d</sup>                                                                                                                          | No                | No              | No                | No                          | No                            | No                         |
| Taking herbal or<br>traditional remedy for<br>raised cholesterol           | No            | No <sup>c</sup>                                                                                                                          | No                | No              | No                | No                          | No                            | No                         |
| <b>Health: History of cardiovascular diseases</b>                          |               |                                                                                                                                          |                   |                 |                   |                             |                               |                            |
| Ever had heart attack or<br>angina or stroke                               | Yes           | Yes                                                                                                                                      | No                | Yes             | Yes               | (HSE 2011)                  | Yes                           | Yes                        |
| Currently taking aspirin<br>regularly to prevent or<br>treat heart disease | Yes           | Actual medication<br>use module:<br>ATC code for<br>aspirin                                                                              | No                | No              | No                | Yes                         | Yes                           | Yes (low-dose<br>aspirin)  |
| Currently taking statins<br>regularly to prevent or<br>treat heart disease | No            | Whether taking<br>prescribed<br>medication to<br>lower blood<br>cholesterol +                                                            | No                | No              | No                | Yes                         | Yes                           | Yes                        |

| WHO STEPS standard <sup>a</sup>                                     | Brazil<br>PNS | Chile<br>ENS                                                                                    | Colombia<br>ENSIN | Colombia<br>ENS | Mexico<br>ENSANUT                                                                                           | England<br>HSE <sup>b</sup> | Scotland<br>SheS <sup>b</sup> | USA<br>NHANES <sup>b</sup>  |
|---------------------------------------------------------------------|---------------|-------------------------------------------------------------------------------------------------|-------------------|-----------------|-------------------------------------------------------------------------------------------------------------|-----------------------------|-------------------------------|-----------------------------|
|                                                                     |               | Actual medication use module:<br>ATC statins codes                                              |                   |                 |                                                                                                             |                             |                               |                             |
| <b>Lifestyle advice from doctor / health worker in past 3 years</b> |               |                                                                                                 |                   |                 |                                                                                                             |                             |                               |                             |
| Quit using tobacco or don't start                                   | Yes           | No                                                                                              | No                | No              | Questions on all these are put with treatment recommendations for diabetes hypertension, & high cholesterol | Yes                         | Yes                           | No                          |
| Reduce salt intake                                                  | No            | No                                                                                              | No                | No              |                                                                                                             | No                          | No                            | Yes (in the last 12 months) |
| Eat at least 5 servings of fruit and/or vegetables daily            | No            | No                                                                                              | No                | No              |                                                                                                             | No                          | No                            | No                          |
| Reduce fat in your diet                                             | No            | No                                                                                              | No                | No              |                                                                                                             | No                          | No                            | Yes (in the last 12 months) |
| Start or do more physical activity                                  | No            | Similar question for hypertension, diabetes and cholesterol on treatment with lifestyle changes | No                | No              |                                                                                                             | No                          | No                            | Yes (in the last 12 months) |
| Maintain a healthy body weight or lose weight                       | No            | Whether a doctor has told him he is overweight                                                  | No                | No              |                                                                                                             | No                          | No                            | Yes (in the last 12 months) |

ENS: Encuesta Nacional de Salud; ENSANUT: Encuesta Nacional de Salud y Nutrición; ENSIN: Encuesta Nacional de Situación Nutricional; FFQ: food frequency questionnaire; GPAQ: Global Physical Activity Questionnaire; HSE: Health Survey for England; IPAQ: International Physical Activity Questionnaire (short form); NHANES: National Health And Nutrition Examination Survey; PASBAQ: Physical Activity & Sedentary Behaviour Assessment Questionnaire; PNS: Pesquisa Nacional de Saúde; qq: questionnaire; SheS: Scottish Health Survey.

<sup>a</sup> WHO STEPS Core items are in normal type; *items from the Expanded STEPS protocol are in italics*. The Pan American version of STEPS instrument 3.1 is used in this table.

<sup>b</sup> These surveys have been run on many occasions. The methods have changed little. Results in this table are for the most recent year, as an example, except where stated.

<sup>c</sup> There was a traditional medicine and complementary medicine use module in 2010, but not matched with a specific disease. Traditional remedies are registered by the nurse in the medication module; only those with ATC code have a code, the rest are not coded.



**Web Table 4. Comparison of measurement protocols in eight national health examination surveys in the Americas and the UK**

| WHO STEPS standard <sup>a</sup>         | Brazil PNS                       | Chile ENS                                        | Colombia ENSIN | Colombia ENS | Mexico ENSANUT             | England HSE <sup>b</sup>         | Scotland SheS <sup>b</sup> | USA NHANES <sup>b</sup>            |
|-----------------------------------------|----------------------------------|--------------------------------------------------|----------------|--------------|----------------------------|----------------------------------|----------------------------|------------------------------------|
| N/A                                     | 2013                             | 2010                                             | 2010           | 2007         | 2012                       | 2013                             | 2008-2011                  | 2011/12                            |
| <b>Physical measurements</b>            |                                  |                                                  |                |              |                            |                                  |                            |                                    |
| Height                                  | yes                              | yes                                              | yes            | yes          | yes                        | yes                              | yes                        | yes                                |
| Conforms to STEPS protocol <sup>c</sup> | yes                              | No stadiometer, no Frankfort plane used;         | yes            | yes          | yes                        | yes                              | yes                        | yes                                |
| Weight                                  | yes                              | yes                                              | yes            | yes          | yes                        | yes                              | yes                        | yes                                |
| Conforms to STEPS protocol <sup>d</sup> | yes                              | yes                                              | yes            | yes          | yes                        | yes                              | yes                        | yes                                |
| If woman is pregnant                    | Excluded from measurements       | Excluded from survey                             | yes            | No           | Excluded from measurements | Excluded from measurements       | Excluded from measurements | Excluded from certain measurements |
| Waist circumference                     | yes                              | yes                                              | yes            | No           | yes                        | yes                              | yes                        | yes                                |
| Conforms to STEPS protocol <sup>e</sup> | yes                              | 2 measures included: midway and over iliac crest | yes            | N/A          | yes                        | yes                              | yes                        | yes                                |
| Hip circumference <sup>f</sup>          | yes                              | No                                               | No             | No           | yes                        | Light indoor clothing            |                            | No                                 |
| No. of readings recorded                | 2 readings unless >3cm different | N/A                                              | N/A            | N/A          | Not specified              | 2 readings unless >3cm different |                            | N/A                                |
| Blood pressure measured <sup>g</sup>    | yes                              | yes                                              | No             | yes          | yes                        | yes                              | yes                        | yes                                |

| WHO STEPS standard <sup>a</sup>       | Brazil PNS                                                | Chile ENS                                                                    | Colombia ENSIN | Colombia ENS                                                                                                 | Mexico ENSANUT                                            | England HSE <sup>b</sup>                                                      | Scotland SheS <sup>b</sup> | USA NHANES <sup>b</sup>                                        |
|---------------------------------------|-----------------------------------------------------------|------------------------------------------------------------------------------|----------------|--------------------------------------------------------------------------------------------------------------|-----------------------------------------------------------|-------------------------------------------------------------------------------|----------------------------|----------------------------------------------------------------|
| Sphygmomanometer                      | Omron HEM 907                                             | Omron HEM 742                                                                | N/A            | Omron HEM-711AC                                                                                              | Mercury; Omron HEM-907 XL in a 1/3 subsample              | Omron HEM 907                                                                 |                            | Mercury                                                        |
| Rest conditions <sup>g</sup>          | BP measured after 5minute rest                            | BP measured after 5minute rest; no talking during measure                    | N/A            | BP measured after ≥5minute rest.                                                                             | BP measured after 5minute rest.                           | No talking for 5 min before, and during; BP measured after 5minute rest.      |                            | No talking for 5 min before, and during                        |
| Other restrictions                    | Avoid eating, drinking alcohol, smoking 30 minutes before | Fasting (thus no eating, no drinking alcohol), empty bladder before          | N/A            | Avoid alcohol or exercise for 12hr, avoid coffee for 1hr before, no smoking for 30 min before; empty bladder | Avoid eating, drinking alcohol, smoking 30 minutes before | Avoid eating, drinking alcohol, smoking & physical activity 30 minutes before |                            | Avoid eating, alcohol, coffee and cigarettes 30 minutes before |
| Arm used                              | Default: right arm                                        | Default: left (ENS 2003 Omron 713C cuff could only be used in left position) | N/A            | Not reported                                                                                                 | Default: right arm                                        | Default: right arm                                                            |                            | Measurements on the right arm                                  |
| Cuff size used <sup>f</sup>           | 3: 17-22cm; 22-32cm; 32-42cm                              | 2: obese cuff used when arm >31cm                                            | N/A            | 1: standard adult cuff                                                                                       | 4: 17-22cm; 22-32cm; 32-42cm, 42-50cm                     | 3: 17-22cm; 22-32cm; 32-42cm                                                  |                            | 4 (+ infant): 17-22cm; 22-30cm; 30-38cm; 38-48cm               |
| 3 readings recorded <sup>f</sup>      | yes                                                       | yes                                                                          | N/A            | 1 reading                                                                                                    | 2 readings                                                | yes                                                                           |                            | yes                                                            |
| Gap between each reading <sup>f</sup> | 1 minute                                                  | 2 minutes                                                                    | N/A            | No                                                                                                           | 1 minute                                                  | 1 minute                                                                      |                            | 30 seconds                                                     |

| WHO STEPS standard <sup>a</sup>                      | Brazil PNS                                                          | Chile ENS                                                                                              | Colombia ENSIN | Colombia ENS   | Mexico ENSANUT                                                                       | England HSE <sup>b</sup>           | Scotland SheS <sup>b</sup> | USA NHANES <sup>b</sup>                                                                                            |
|------------------------------------------------------|---------------------------------------------------------------------|--------------------------------------------------------------------------------------------------------|----------------|----------------|--------------------------------------------------------------------------------------|------------------------------------|----------------------------|--------------------------------------------------------------------------------------------------------------------|
| Medication for raised blood pressure in past 2 weeks | yes                                                                 | Whether taking prescribed medication to lower blood pressure + Actual medication use module: ATC codes | No             | No             | yes (if they are taking any drugs to control hypertension)                           | yes (prescribed; taken in past 7d) |                            | Whether taking prescribed medicine for high blood pressure now; list of prescribed medicines taken in past 30 days |
| Heart rate <sup>h</sup>                              | yes                                                                 | yes                                                                                                    | No             | No             | No                                                                                   | yes                                | yes                        | yes                                                                                                                |
| <b>Biochemical measurements</b>                      |                                                                     |                                                                                                        |                |                |                                                                                      |                                    |                            |                                                                                                                    |
| Blood glucose                                        | No: glycated hemoglobin                                             | yes & glycated Hb (if capillary $\geq 100\text{mg/dl}$ or known diabetic)                              | No             | yes            | yes                                                                                  | No: glycated hemoglobin            |                            | yes & glycated Hb                                                                                                  |
| Venous sample                                        | yes                                                                 | yes & capillary                                                                                        | No             | No - capillary | yes (subsample)                                                                      | yes                                |                            | yes                                                                                                                |
| Fasting or not (12hr)                                | No                                                                  | yes (10-12)                                                                                            | N/A            | yes            | yes                                                                                  | No                                 |                            | yes                                                                                                                |
| Insulin or other antidiabetic drugs that day         | (whether taking insulin or other antidiabetic drug in past 2 weeks) | (prescribed; told to take medicines as usual)                                                          | N/A            | No             | In the adult health questionnaire if they are consuming any drugs or insulin or both | (prescribed; taken in past 7d)     |                            | yes                                                                                                                |
| Total cholesterol                                    | yes                                                                 | yes (52%)                                                                                              | No             | yes            | yes                                                                                  | yes                                | yes                        | yes                                                                                                                |

| WHO STEPS standard <sup>a</sup>                   | Brazil PNS                                                            | Chile ENS                                     | Colombia ENSIN | Colombia ENS | Mexico ENSANUT   | England HSE <sup>b</sup>       | Scotland SheS <sup>b</sup> | USA NHANES <sup>b</sup> |
|---------------------------------------------------|-----------------------------------------------------------------------|-----------------------------------------------|----------------|--------------|------------------|--------------------------------|----------------------------|-------------------------|
| Medication for raised cholesterol in past 2 weeks | (whether a doctor has advised the participant should take medication) | (prescribed; told to take medicines as usual) | N/A            | No           | (past 12 months) | (prescribed; taken in past 7d) |                            | yes                     |
| <i>Triglycerides</i>                              | <i>yes</i>                                                            | <i>yes (52%)</i>                              | <i>No</i>      | <i>yes</i>   | <i>yes</i>       | <i>No</i>                      | <i>No</i>                  | <i>yes</i>              |
| <i>HDL cholesterol</i>                            | <i>yes</i>                                                            | <i>yes (52%)</i>                              | <i>No</i>      | <i>yes</i>   | <i>yes</i>       | <i>yes</i>                     | <i>yes</i>                 | <i>yes</i>              |

ENS: Encuesta Nacional de Salud; ENSANUT: Encuesta Nacional de Salud y Nutrición; ENSIN: Encuesta Nacional de Situación Nutricional; HSE: Health Survey for England; NHANES: National Health And Nutrition Examination Survey. PNS: Pesquisa Nacional de Saúde; SheS: Scottish Health Survey;

<sup>a</sup> WHO STEPS Core items are in normal type; *items from the Expanded STEPS protocol are in italics.*

<sup>b</sup> These surveys have been run on many occasions. The methods have changed little. Results in this table are for the most recent year, as an example.

<sup>c</sup> Height measurement: using a portable stadiometer (height measuring board) on a firm surface against a wall, with the head in the Frankfort plane for maximum height; participant without footwear or head gear, where appropriate.

<sup>d</sup> Weight measurement: portable electronic scales on a firm, flat surface; participant without footwear

<sup>e</sup> Waist circumference measurement: taken directly over participant's skin if possible, otherwise over light clothing; at the end of normal expiration, with arms relaxed at the side and feet together; at midpoint between lower margin of lowest palpable rib and top of the iliac crest; using a constant tension tape positioned horizontally across front and back.

<sup>f</sup> Hip circumference measurement: taken directly over participant's skin if possible, otherwise over light clothing; with arms relaxed at the side and feet together; at the maximum circumference over the buttocks; using a constant tension tape positioned horizontally across front and back.

<sup>g</sup> Blood pressure measurement: taken after 15 minute rest sitting quietly with legs uncrossed; 3 measurements taken, with 3minute rest between each measurement, using a digital automatic blood pressure monitor, e.g. OMRON, with an appropriate cuff on the left arm.

<sup>h</sup> Heart rate measurement is automatically provided when blood pressure is measured.
